# Supplementary material for: 3D printing of highly conductive silver architectures enabled to sinter at low temperatures
Source: Royal Society of Chemistry journal article supplement (doi:10.1039/c9nr05894j), 2019-01-01
Supplement: c9nr05894j1.pdf [file c9nr05894j1.pdf]

## Electronic supplementary information

### 3D Printing of Highly Conductive Silver Architectures Enabled to Sinter at Low Temperatures

*Jung Hyun Kim,<sup>#, a,b</sup> Sanghyeon Lee,<sup>#, a,c</sup> Muhammad Wajahat,<sup>a,b</sup> Jinhyuck Ahn,<sup>a,b</sup> Jaeyeon Pyo,<sup>a</sup> Won Suk Chang,<sup>a</sup> and Seung Kwon Seol<sup>\*,a,b</sup>*

<sup>a</sup>Nano Hybrid Technology Research Center, Korea Electrotechnology Research Institute (KERI), Changwon-si, Gyeongsangnam-do, 51543, Republic of Korea

<sup>b</sup>Electrical Functionality Material Engineering, University of Science and Technology (UST), Changwon-si, Gyeongsangnam-do, 51543, Republic of Korea

<sup>c</sup>Department of Electronics and Computer Engineering, Hanyang University, Seoul, 133-791, Republic of Korea

\*Corresponding author

Seung Kwon Seol, Phone: +82-55-280-1462; Fax: +82-55-280-1590;

E-mail: skseol@keri.re.kr

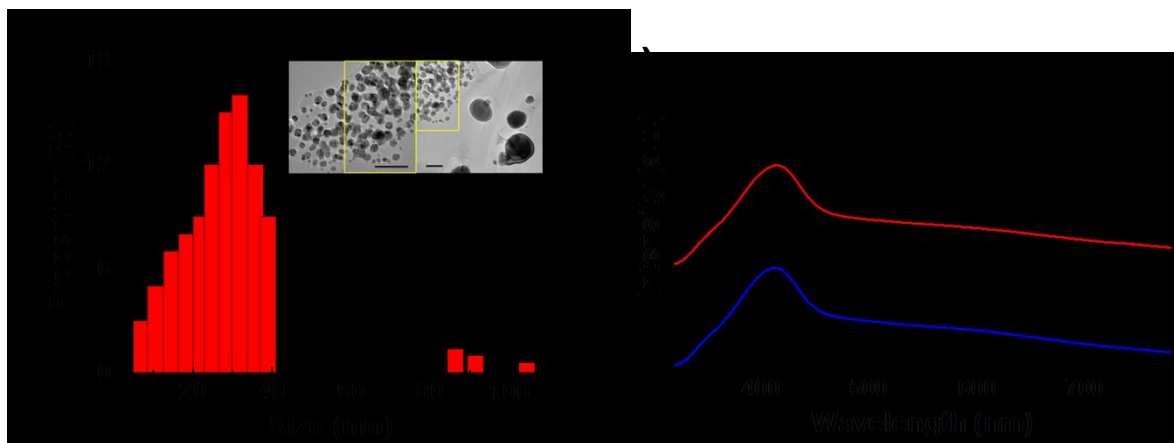

**Fig. S1.** (a) TEM image and the corresponding size distribution of synthesized PAA-AgNPs. The size distribution of AgNPs was obtained by measuring the diameter of more than 150 particles. Inset is corresponding TEM images of PAA-AgNPs. (Scale bar is 100 nm). (b) UV-vis absorption spectra of PAA-AgNPs synthesized separately.

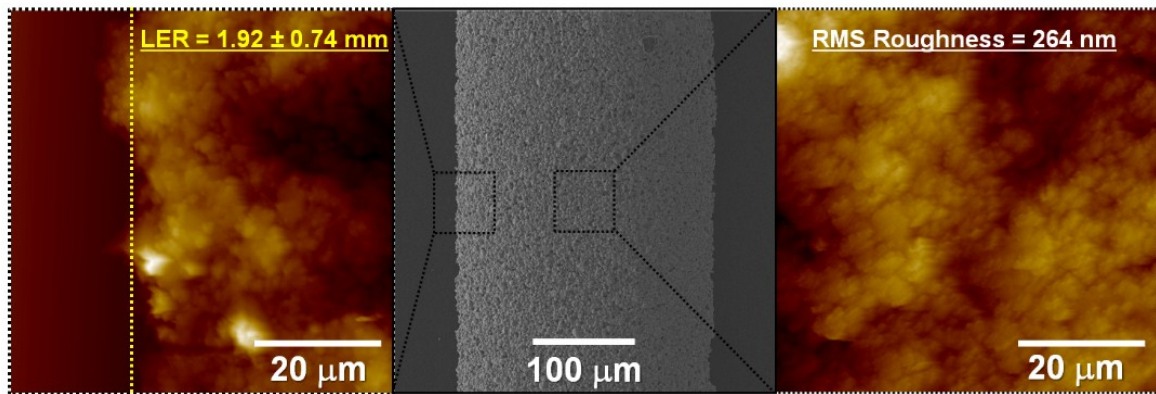

**Fig. S2.** FE-SEM and AFM analysis for printed Ag lines with a width ( $W_p$ ) of 250 μm. Line edge roughness (LER) and RMS roughness of surface are  $1.92 \pm 0.74$  μm and 264 nm, respectively.

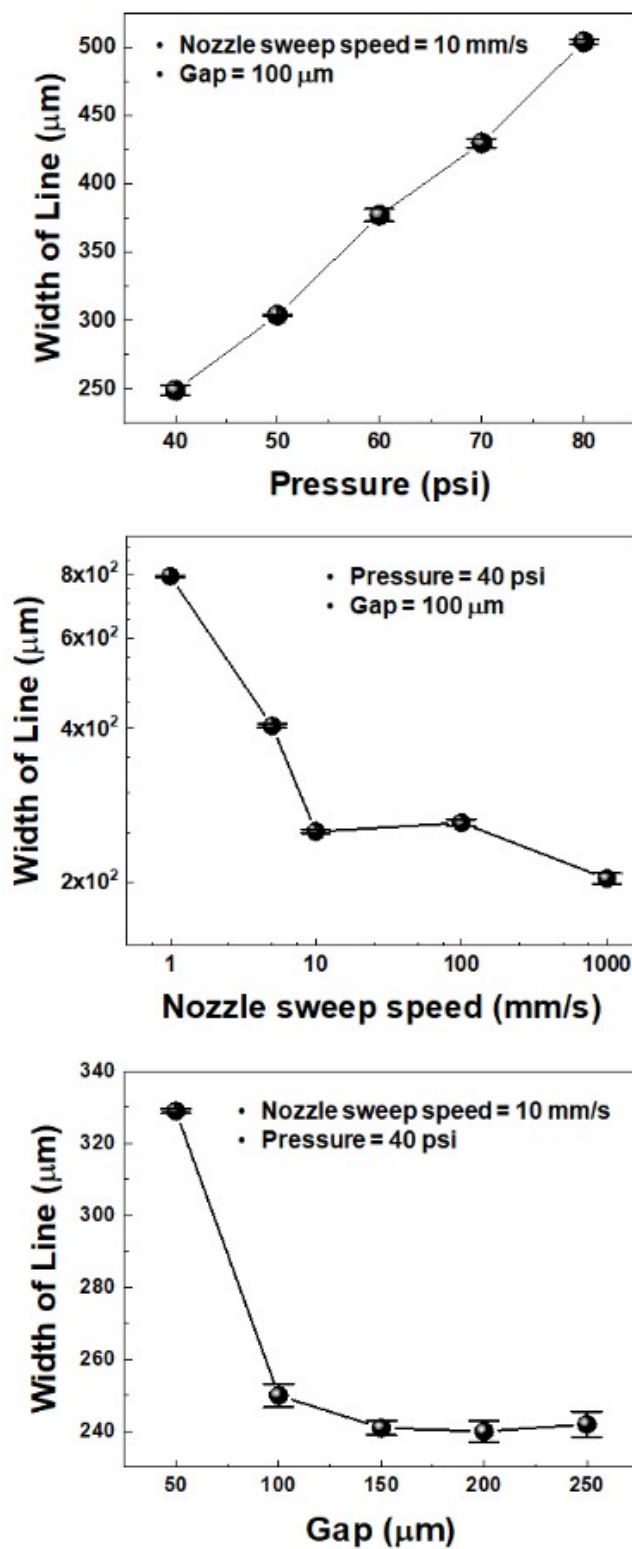

**Fig. S3.** The printed line width as functions of (a) the applied pressure, (b) the nozzle sweep speed, and (c) the gap between nozzle and substrate (inner diameter ( $D_n$ ) = 200  $\mu\text{m}$ ).

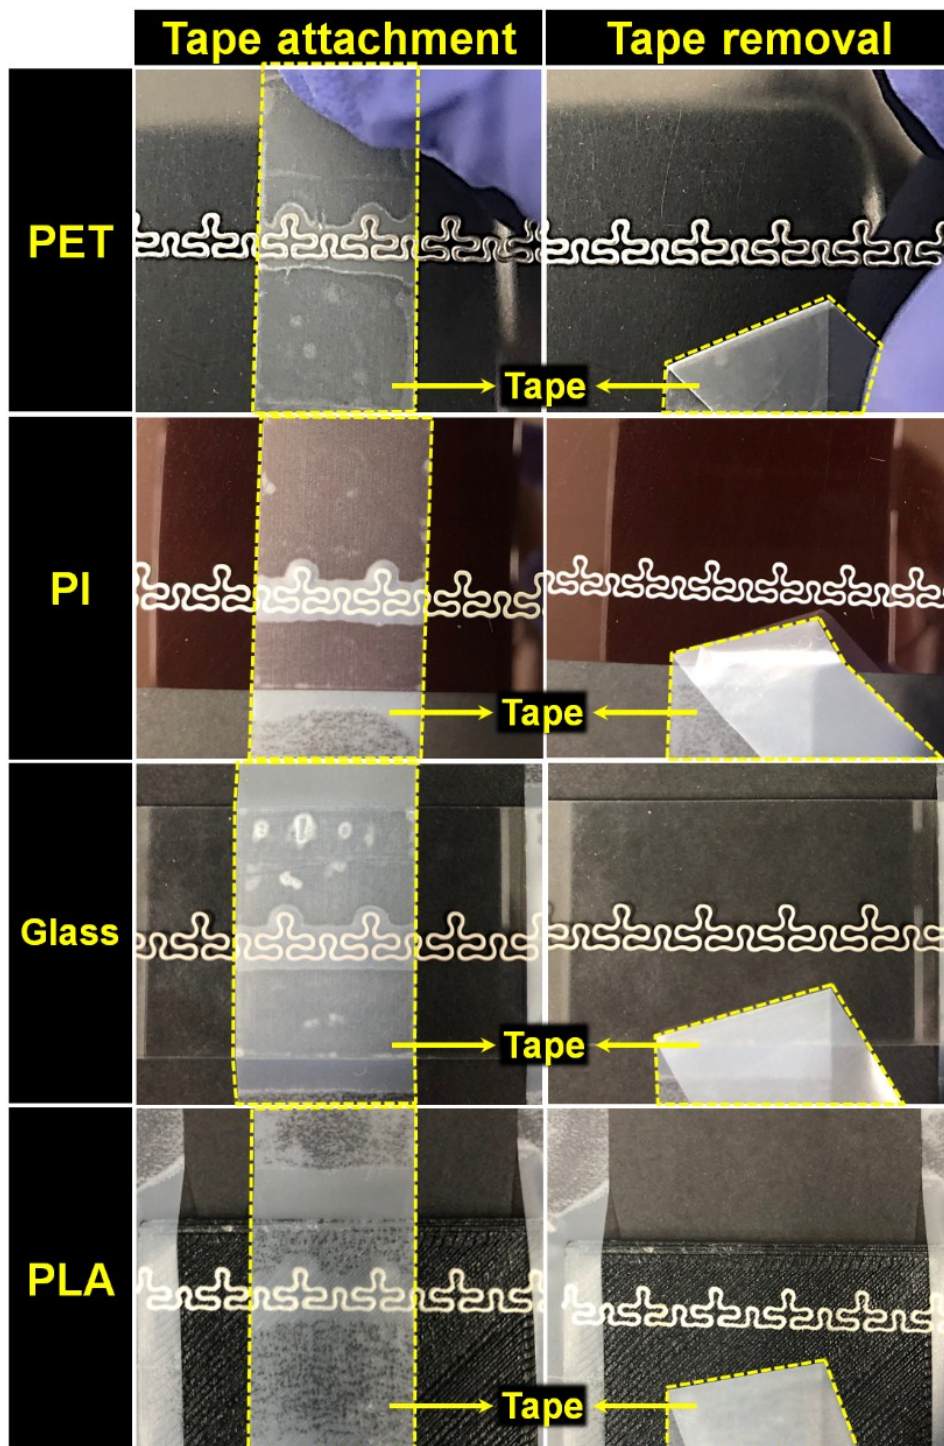

**Fig. S4.** Tape-test to verify the adhesion of the Ag 2D pattern to different substrates with hydrophilic surface (PET, PI, PLA, and glass).

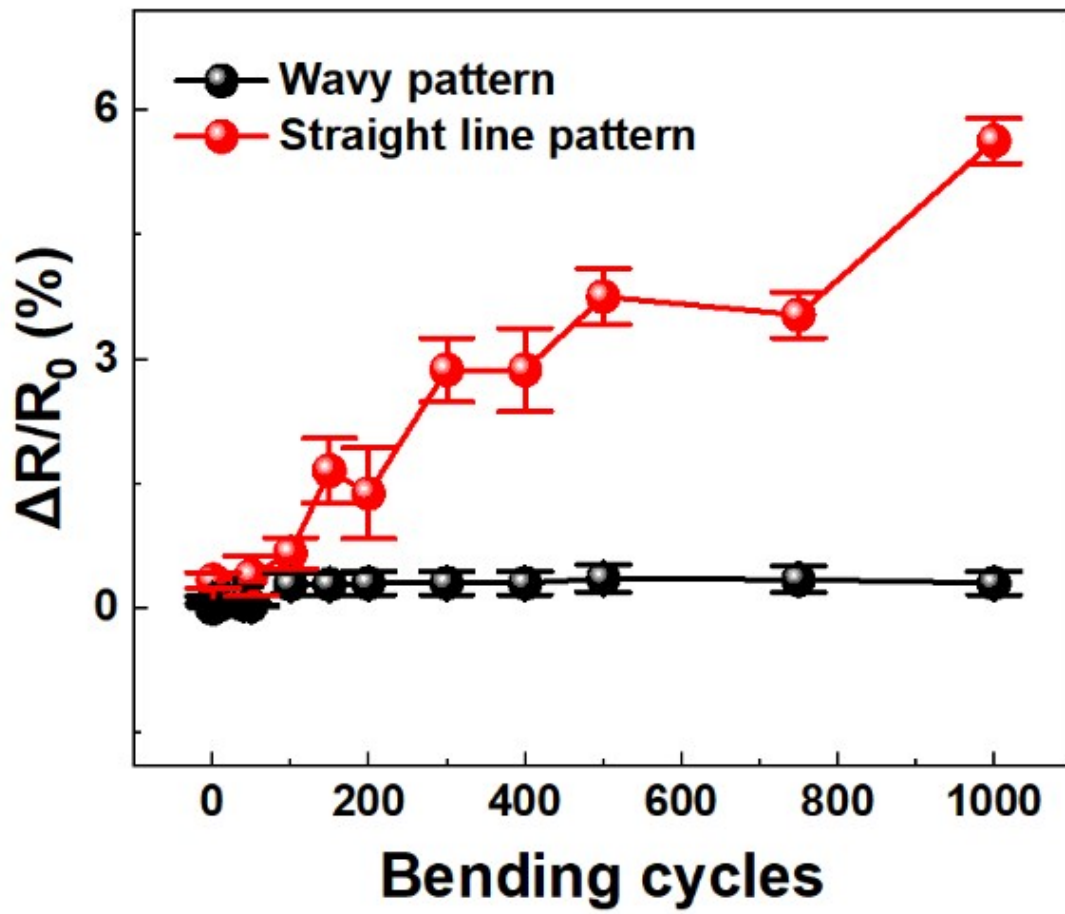

**Fig. S5.** The relative resistance change of wavy (within 0.5%) and straight (~ 5.6%) patterns with  $W_p$  of 250  $\mu\text{m}$  after 1,000 times of bending at a curvature radius of 8 mm.

**Video 1:** Printing of conductive Ag grid on polyimide (PI) substrate (AVI)

**Video 2:** Flexible behavior of conductive Ag grid on polyimide (PI) substrate (AVI)

**Video 3:** Printing of nonlinear and arbitrary Ag pattern, “Bird” (AVI)

**Video 4:** 3D printing of Ag wavy structure (AVI)

**Video 5:** Printing of Ag wavy pattern on PET substrate (AVI)

**Video 6:** Tape-test to verify the adhesion of the Ag pattern to the PET substrate (AVI)

**Video 7:** Bending test of printed Ag pattern (AVI)

**Video 8:** Operation of Ag circuit at bending and twisting (AVI)

**Video 9:** Operation of blinking device with 3D bridge-type interconnect (AVI)
